# Supplementary material for: Inflammation mediates the relationship between obesity and retinal vascular calibre in 11-12 year-olds children and mid-life adults
Source: PubMed Central journal article supplement (PMC7081237; doi:10.1038/s41598-020-61801-w), 2020-03-19
Supplement: 41598_2020_61801_MOESM1_ESM.pdf [file 41598_2020_61801_MOESM1_ESM.pdf]

**Title: Inflammation mediates the relationship between obesity and retinal vascular calibre in 11-12 year-olds children and mid-life adults**

**Authors:**

Mengjiao Liu, Kate Lycett, Margarita Moreno-Betancur, Tien Yin Wong, Mingguang He, Richard Saffery, Markus Juonala, Jessica A. Kerr, Melissa Wake, David P. Burgner

**Supplementary figure. Participant flowchart**

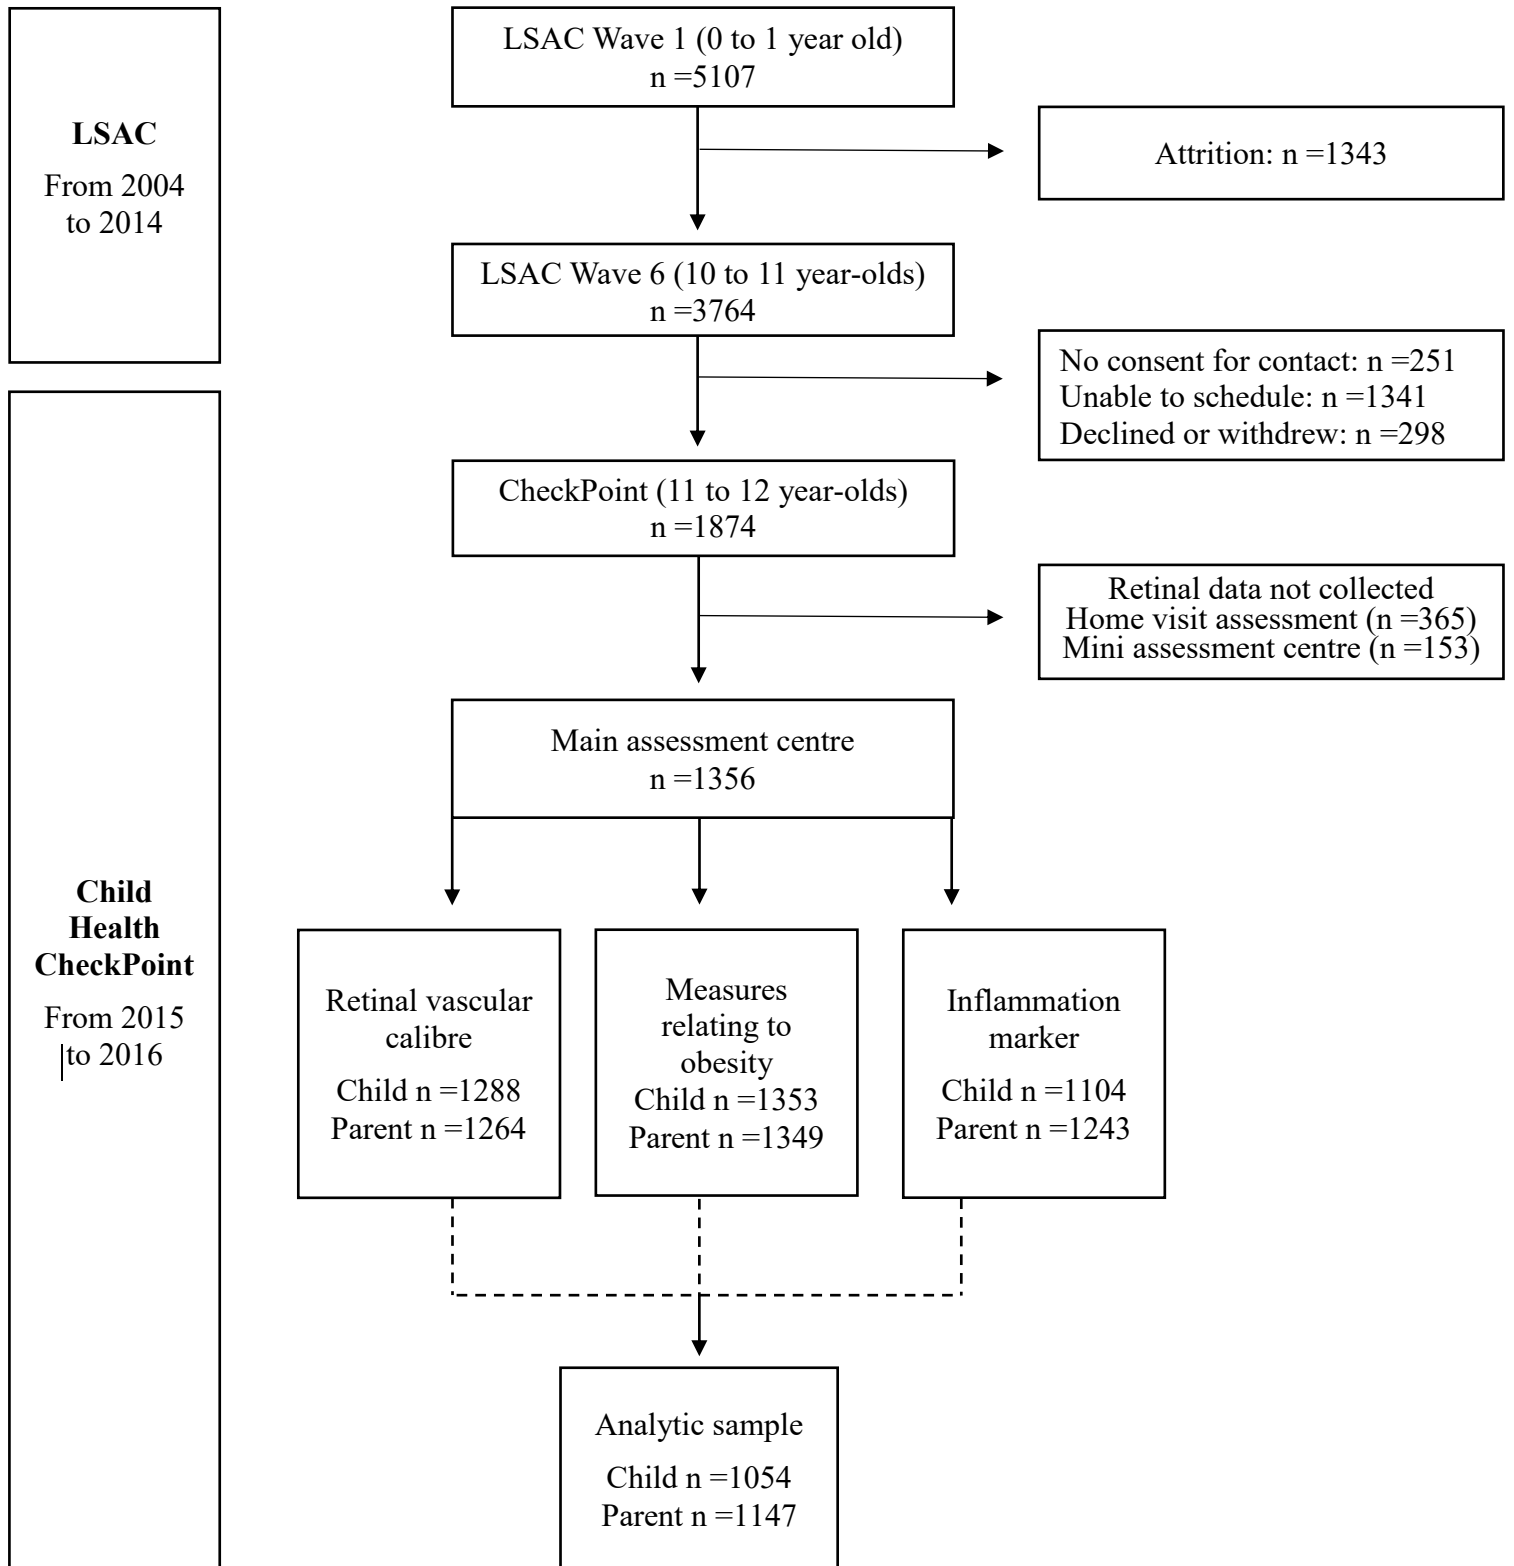

N: number of responses; LSAC, Longitudinal Study of Australian Children

**Supplementary table.** Associations of GlycA with retinal vascular calibre with adjustment for age, sex, SEP, BMI and LDL.

| <b>Outcome measures</b>    | <b>Children</b>             |                 | <b>Adults</b>               |                 |
|----------------------------|-----------------------------|-----------------|-----------------------------|-----------------|
|                            | <b>Effect size (95% CI)</b> | <b><i>p</i></b> | <b>Effect size (95% CI)</b> | <b><i>p</i></b> |
| Retinal arteriolar calibre | 0.004 (-0.06, 0.07)         | 0.29            | -0.03 (-0.10, 0.05)         | 0.49            |
| Retinal venular calibre    | 0.07 (0.01, 0.14)           | 0.03            | 0.03 (-0.04, 0.11)          | 0.37            |
